# Supplementary material for: Assigning mitochondrial localization of dual localized proteins using a yeast Bi-Genomic Mitochondrial-Split-GFP
Source: eLife. 2020 Jul 13;9:e56649. doi: 10.7554/eLife.56649 (PMC7358010; doi:10.7554/eLife.56649)
Supplement: Supplementary file 4. [file elife-56649-supp4.docx]

| **Protein** | **Gene** | **Plasmid** | **expected MW (kDa)** | **transformed in** |
| --- | --- | --- | --- | --- |
| cytecARS β11ch | *ALA1* | pAG414pGPD *ALA1* β11ch | 118 | BiG Mito-Split-GFP  *MATa his3-11,15 trp1-1 leu2-3,112 ura3-1 CAN1 arg8::HIS3* |
| mtecARS β11ch | *ALA1-25ACG* | pAG414pGPD *ALA1-25ACG* β11ch | 119 |
| cDRS β11ch | *DPS1* | pAG414pGPD *DPS1* β11ch | 74 |
| cERS β11ch | *GUS1* | pAG414pGPD *GUS1* β11ch | 91 |
|  | *GUS1* | pAG414pGUS1 *GUS1* β11ch | 91 |
| N30cERS β11ch | N30*GUS1* | pAG414pGPD *N30GUS1* β11ch | 13 |
| ∆N30cERS β11ch | ∆N30*GUS* | pAG414pGPD *∆N30GUS1* β11ch | 87 |
| N70cERS β11ch | N70*GUS1* | pAG414pGPD *N70GUS1* β11ch | 18 |
| N200cERS β11ch | N200*GUS1* | pAG414pGPD *N200GUS1* β11ch | 32 |
| ∆N200cERS β11ch | ∆N200*GUS1* | pAG414pGPD *∆N200GUS1* β11ch | 69 |
| cFRS1 β11ch | *FRS1* | pAG414pGPD *FRS1* β11ch | 76 |
| cFRS2 β11ch | *FRS2* | pAG414pGPD *FRS2* β11ch | 66 |
| cytecGRS1 β11ch | *GRS1* | pAG414pGPD *GRS1* β11ch | 86 |
| mtecGRS1 β11ch | *GRS1-23TTG* | pAG414pGPD *GRS1-23TTG* β11ch | 87 |
| cGRS2 β11ch | *GRS2* | pAG414pGPD *GRS2* β11ch | 80 |
| cytecHRS β11ch | *HTS1∆20ATG* | pAG414pGPD *HTS1∆20ATG* β11ch | 67 |
| mtecHRS β11ch | *HTS1* | pAG414pGPD *HTS1* β11ch | 70 |
| cIRS β11ch | *ILS1* | pAG414pGPD *ILS1* β11ch | 133 |
| cKRS β11ch | *KRS1* | pAG414pGPD *KRS1* β11ch | 78 |
| cLRS β11ch | *CDC60* | pAG414pGPD *CDC60* β11ch | 134 |
| cMRS β11ch | *MES1* | pAG414pGPD *MES1* β11ch | 96 |
| cNRS β11ch | *DED81* | pAG414pGPD *DED81* β11ch | 72 |
| cQRS β11ch | *GLN4* | pAG414pGPD *GLN4* β11ch | 103 |
| cRRS β11ch | *RRS1* | pAG414pGPD *RRS1* β11ch | 80 |
| cSRS β11ch | *SES1* | pAG414pGPD *SES1* β11ch | 64 |
| cTRS β11ch | *THS1* | pAG414pGPD *THS1* β11ch | 95 |
| mtecVRS β11ch | *VAS1* | pAG414pGPD *VAS1* β11ch | 136 |
| cytecVRS β11ch | *VAS1∆46ATG* | pAG414pGPD *VAS1∆46ATG* β11ch | 129 |
| cWRS β11ch | *WRS1* | pAG414pGPD *WRS1* β11ch | 60 |
| cYRS β11ch | *TYS1* | pAG414pGPD *TYS1* β11ch | 54 |
| Pam16 β11ch | *PAM16* | pAG414pGPD *PAM16* β11ch | 27 |
|  | *PAM16* | pAG304pGPD *PAM16* β11ch | 27 |
| Atp4 β11ch | *ATP4* | pAG414pGPD *ATP4* β11ch | 37 |
| Pgk1 β11ch | *PGK1* | pAG414pGPD *PGK1* β11ch | 55 |
|  | *PGK1* | pAG304pGPD *PGK1* β11ch | 55 |
| N100cCRS β11ch | *N100CRS1* | pAG414pGPD *N100CRS1* β11ch | 21 |
| *Ath*cERS β11ch | *At5g26710* | pAG414pGPD *At5g26710* β11ch | 93 |
| *Ath*mt/chlERSβ11ch | *OVA3* | pAG414pGPD *OVA3* β11ch | 73 |
| *Mmu*Ago2 β11ch | *AGO2* | pAG414pGPD *AGO2* β11ch | 102 |
| *Hsa*Ago2β11ch | *AGO2* | pAG414pGPD *AGO2* β11ch | 102 |

| **Proteins** | **Genes** | **Plasmids** | **expected MW (kDa)** | **transformed in** |
| --- | --- | --- | --- | --- |
| mtGatFβ1-10 | *GTF1* | pRS415pADH *GTF1* β1-10 | 45 | BY4742  *MATα his3Δ1 leu2Δ0 lys2Δ0 ura3Δ0* |

**Supplementary file 4.**
